# Supplementary material for: A Multi-Skilled Mathematical Model of Bacterial Attachment in Initiation of Biofilms
Source: MDPI journal article supplement (doi:10.3390/microorganisms10040686), 2022-03-23
Supplement: s1 [file s1]

A Multi-Skilled Mathematical Model of Bacterial Attachment in  
Initiation of Biofilms  
Supplementary Material

Kanchana Chathoth

Louis Fostier

Bénédicte Martin

Christine Baysse

Fabrice Mahé

# Supplementary Material

| Organism                        | Sequence (5' → 3')            |
|---------------------------------|-------------------------------|
| <i>Streptococcus gordonii</i>   | F: AAG-CAA-CGC-GAA-GAA-CCT-TA |
|                                 | R: GTC-TCG-CTA-GAG-TGC-CCA-AC |
| <i>Porphyromonas gingivalis</i> | F: TGG-GTT-TAA-AGG-GTG-CGT-AG |
|                                 | R: CAA-TCG-GAG-TTC-CTC-GTG-AT |
| <i>Treponema denticola</i>      | F: CGC-GTC-CCA-TTA-GCT-AGT-TG |
|                                 | R: TTC-TTC-ATT-CAC-ACG-GCG-TC |

Table S1: List of primers used for the study.

| Iron              | Bacteria | $biovol[\mu\text{m}^3/\mu\text{m}^2]$ | $hmean[\mu\text{m}]$ | $rough$   | $hmeanb[\mu\text{m}]$ | $hmax[\mu\text{m}]$ |
|-------------------|----------|---------------------------------------|----------------------|-----------|-----------------------|---------------------|
| 0.8 $\mu\text{M}$ | Sg       | 1.54±0.57                             | 1.27±0.40            | 1.36±0.25 | 4.00±0.69             | 7.11±1.25           |
|                   | Pg       | 0.13±0.06                             | 0.10±0.05            | 1.92±0.03 | 2.53±0.28             | 5.54±0.52           |
|                   | Td       | 0.31±0.16                             | 0.36±0.18            | 1.85±0.06 | 4.83±0.54             | 13.78±3.14          |
|                   | SgPg     | 1.03±0.46                             | 0.84±0.30            | 1.50±0.19 | 3.41±0.37             | 9.69±1.64           |
|                   | SgTd     | 0.45±0.12                             | 0.45±0.10            | 1.80±0.05 | 4.63±0.51             | 11.46±1.32          |
|                   | PgTd     | 0.32±0.13                             | 0.28±0.13            | 1.79±0.10 | 2.68±0.33             | 8.12±1.19           |
|                   | SgPgTd   | 1.98±0.44                             | 1.84±0.44            | 1.21±0.11 | 4.32±0.48             | 14.16±0.94          |
| 8 $\mu\text{M}$   | Sg       | 1.54±0.86                             | 1.26±0.68            | 1.35±0.33 | 3.54±0.51             | 8.31±1.71           |
|                   | Pg       | 0.13±0.07                             | 0.10±0.05            | 1.92±0.04 | 2.50±0.35             | 5.98±0.45           |
|                   | Td       | 0.12±0.05                             | 0.14±0.06            | 1.94±0.03 | 5.17±1.69             | 13.28±4.64          |
|                   | SgPg     | 1.28±0.38                             | 1.20±0.30            | 1.42±0.17 | 4.09±0.61             | 11.83±1.13          |
|                   | SgTd     | 3.11±0.53                             | 2.66±0.44            | 0.92±0.13 | 4.17±0.28             | 11.52±1.22          |
|                   | PgTd     | 0.49±0.18                             | 0.42±0.15            | 1.71±0.09 | 2.84±0.33             | 8.75±1.02           |
|                   | SgPgTd   | 1.77±0.43                             | 1.86±0.46            | 1.32±0.10 | 5.14±0.58             | 15.74±0.96          |
| 80 $\mu\text{M}$  | Sg       | 1.41±0.87                             | 1.11±0.67            | 1.41±0.37 | 3.53±0.69             | 7.68±1.51           |
|                   | Pg       | 0.14±0.07                             | 0.10±0.05            | 1.91±0.04 | 2.32±0.30             | 5.60±0.52           |
|                   | Td       | 0.05±0.04                             | 0.06±0.04            | 1.97±0.03 | 3.96±0.61             | 9.71±2.19           |
|                   | SgPg     | 1.38±0.39                             | 1.45±0.43            | 1.43±0.16 | 4.85±0.53             | 13.09±0.97          |
|                   | SgTd     | 3.64±0.64                             | 3.18±0.57            | 0.83±0.13 | 4.56±0.33             | 12.08±1.04          |
|                   | PgTd     | 0.47±0.18                             | 0.41±0.14            | 1.72±0.09 | 3.01±0.32             | 8.62±0.73           |
|                   | SgPgTd   | 1.67±0.47                             | 1.83±0.62            | 1.40±0.12 | 5.74±0.97             | 15.36±1.13          |

Table S2: Microscopic experimental measurements of bacterial attachment

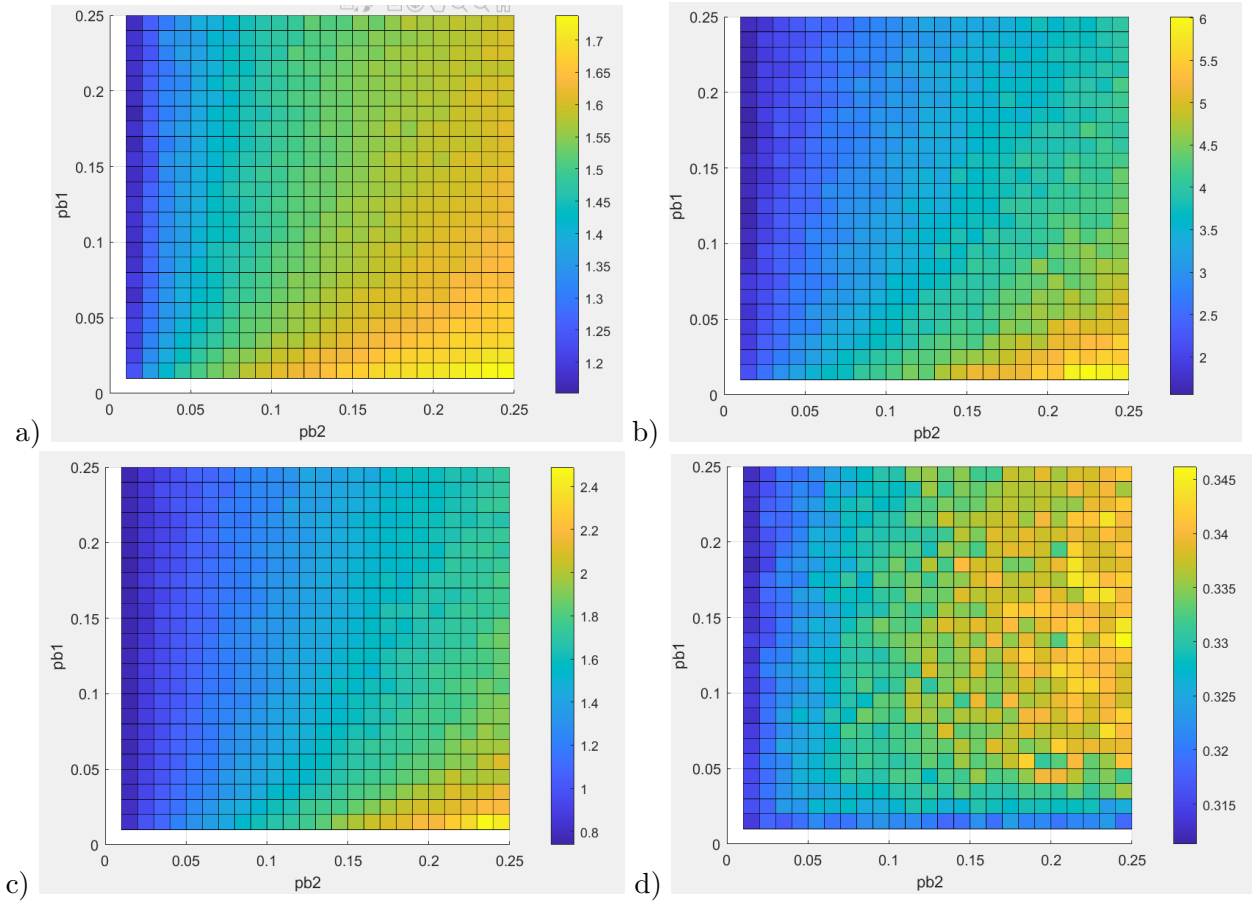

Figure S1: Effect of the ratio of probability  $pb1$  values against  $pb2$  values on bacterial attachment characteristics using 2D one species model for a) roughness coefficient, b) maximum thickness, c) mean thickness on bacteria only, d) mean thickness on whole surface (including voids). 50 simulations were performed with  $Nb_{cell} = 100$  and  $ps = 0.005$ . Color grade indicates the average value of each bacterial attachment criterium according to  $pb$  or  $ps$  values.

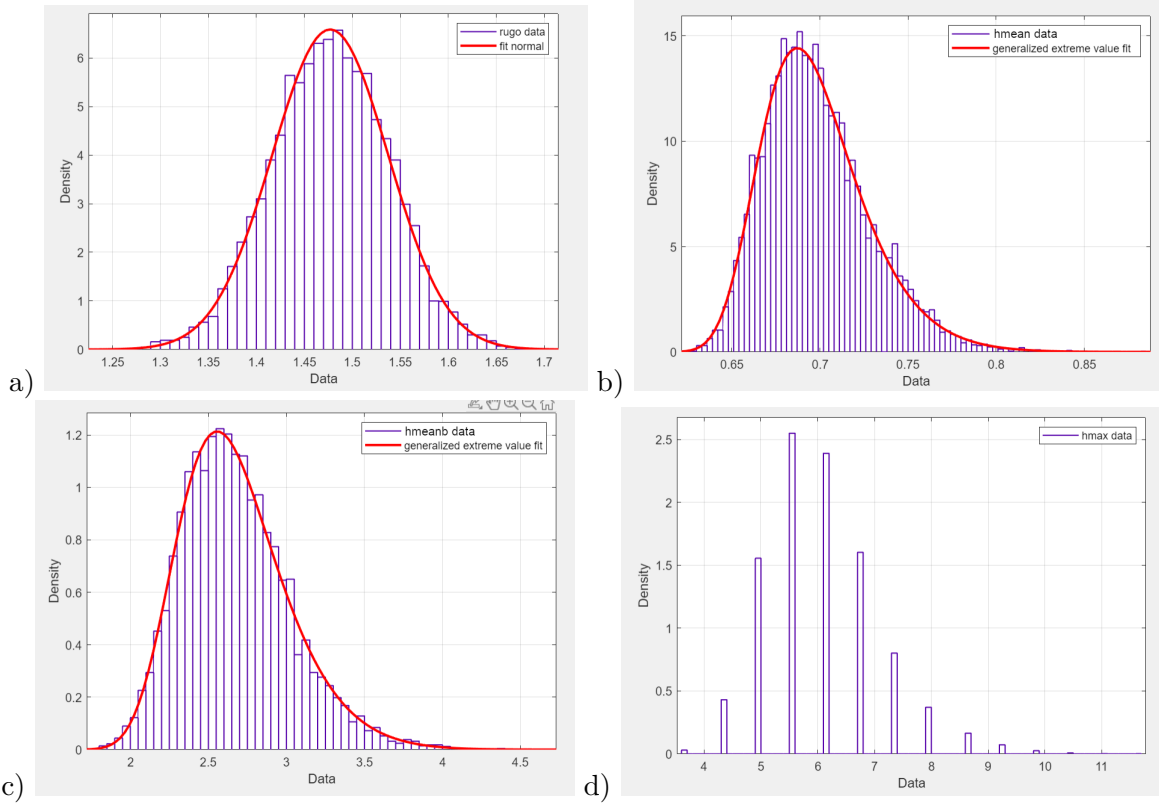

Figure S2: Distribution of the values with  $N = 10000$  simulations,  $Nb_{cell} = 200$ ,  $ps = 0.001$ ,  $pb1 = pb2 = 0.1$  for a) the rugosity coefficient of normal law  $N(1.48, 0.06)$ , b) the mean thickness of generalized extreme law ( $\mu = 0.6855$ ,  $\sigma = 0.026$ ,  $\zeta = -0.077$ ), c) the mean thickness on biofilm of generalized extreme law ( $\mu = 2.525$ ,  $\sigma = 0.305$ ,  $\zeta = -0.098$ ), d) the maximum thickness of discrete law because its value is a multiple of  $dx$ .

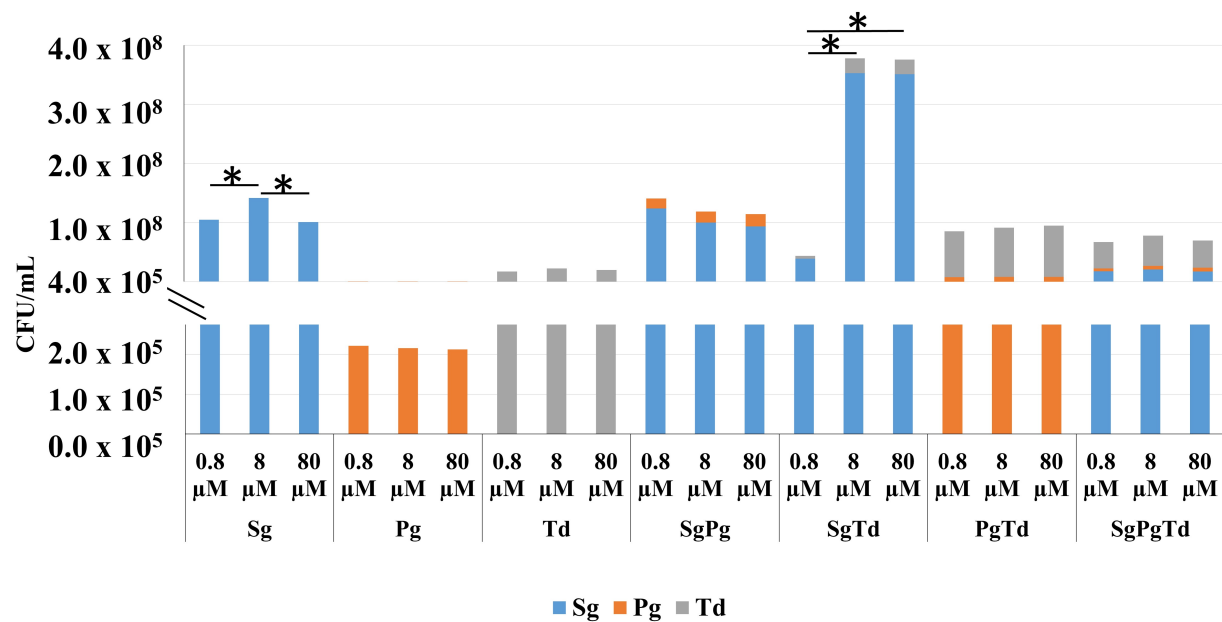

Figure S3: Comparison between mono-, dual- and three-species conditions. Initial attachment for each species were assessed for mono-species (*S. gordonii*-Sg, *P. gingivalis*-Pg and *T. denticola*-Td), dual-species (*S. gordonii*-*P. gingivalis*: SgPg, *S. gordonii*-*T. denticola*: SgTd, *P. gingivalis*-*T. denticola*: PgTd) and three-species (*S. gordonii*-*P. gingivalis*-*T. denticola*: SgPgTd) 2-hour sessile cells at sub-optimal (0.8 μM), optimal (8 μM) and excess iron (80 μM) levels. \* indicates P-value < 0.05.

| Iron<br>[ $\mu$ M] | Bacterium            | Mono-<br>species<br>attachment | Dual-species attachment                    |                                           |                                             | Three-<br>species<br>attachment |
|--------------------|----------------------|--------------------------------|--------------------------------------------|-------------------------------------------|---------------------------------------------|---------------------------------|
|                    |                      |                                | <i>S. gordonii</i><br><i>P. gingivalis</i> | <i>S. gordonii</i><br><i>T. denticola</i> | <i>P. gingivalis</i><br><i>T. denticola</i> |                                 |
| 0.8                | <i>S. gordonii</i>   | 1.05E+08<br>$\pm$ 2.82E+07     | 1.16E+08<br>$\pm$ 1.02E+08                 | 4.20E+07<br>$\pm$ 1.33E+07                |                                             | 1.79E+07<br>$\pm$ 2.44E+06      |
|                    | <i>P. gingivalis</i> | 2.21E+05<br>$\pm$ 9.76E+04     | 1.47E+07<br>$\pm$ 1.46E+07                 |                                           | 7.66E+06<br>$\pm$ 3.99E+06                  | 4.77E+06<br>$\pm$ 7.36E+05      |
|                    | <i>T. denticola</i>  | 1.74E+07<br>$\pm$ 4.36E+06     |                                            | 5.02E+06<br>$\pm$ 2.68E+06                | 8.07E+07<br>$\pm$ 3.43E+07                  | 4.46E+07<br>$\pm$ 1.45E+07      |
| 8                  | <i>S. gordonii</i>   | 1.42E+08<br>$\pm$ 4.11E+07     | 8.76E+07<br>$\pm$ 7.32E+07                 | 3.53E+08<br>$\pm$ 7.21E+07                |                                             | 2.07E+07<br>$\pm$ 9.75E+06      |
|                    | <i>P. gingivalis</i> | 2.16E+05<br>$\pm$ 6.79E+04     | 1.62E+07<br>$\pm$ 1.42E+07                 |                                           | 7.33E+06<br>$\pm$ 3.36E+06                  | 6.27E+06<br>$\pm$ 1.35E+06      |
|                    | <i>T. denticola</i>  | 2.23E+07<br>$\pm$ 8.29E+06     |                                            | 2.55E+07<br>$\pm$ 1.43E+07                | 9.39E+07<br>$\pm$ 5.01E+07                  | 5.10E+07<br>$\pm$ 1.06E+07      |
| 80                 | <i>S. gordonii</i>   | 1.01E+08<br>$\pm$ 2.20E+07     | 7.86E+07<br>$\pm$ 6.64E+07                 | 3.72E+08<br>$\pm$ 1.05E+08                |                                             | 1.71E+07<br>$\pm$ 6.27E+06      |
|                    | <i>P. gingivalis</i> | 2.13E+05<br>$\pm$ 7.77E+04     | 1.83E+07<br>$\pm$ 1.43E+07                 |                                           | 8.10E+06<br>$\pm$ 3.77E+06                  | 6.76E+06<br>$\pm$ 8.74E+05      |
|                    | <i>T. denticola</i>  | 2.00E+07<br>$\pm$ 6.65E+06     |                                            | 2.44E+07<br>$\pm$ 1.14E+07                | 9.15E+07<br>$\pm$ 5.02E+07                  | 4.67E+07<br>$\pm$ 9.37E+06      |

Table S3: Concentration of each species (CFU/mL) in mono-species and multispecies biofilms at 0.8, 8 and 80  $\mu$ M of iron.

| Bacteria | Data           | $biovol[\mu\text{m}^3/\mu\text{m}^2]$ | $hmean[\mu\text{m}]$ | $rough$       | $hmeanb[\mu\text{m}]$ | $hmax[\mu\text{m}]$ |
|----------|----------------|---------------------------------------|----------------------|---------------|-----------------------|---------------------|
| Sg       | 2D simulations | 1.11                                  | $1.26\pm0.05$        | $1.32\pm0.07$ | $3.65\pm0.43$         | $8.34\pm1.38$       |
|          | 3D simulations | 1.20                                  | $1.27\pm0.00$        | $1.25\pm0.04$ | $3.19\pm0.17$         | $9.34\pm0.77$       |
|          | experiments    | $1.54\pm0.86$                         | $1.26\pm0.05$        | $1.35\pm0.33$ | $3.54\pm0.51$         | $8.31\pm1.71$       |
| Pg       | 2D simulations | 0.09                                  | $0.10\pm0.01$        | $1.91\pm0.02$ | $2.40\pm0.76$         | $4.26\pm1.30$       |
|          | 3D simulations | 0.09                                  | $0.10\pm0.00$        | $1.92\pm0.01$ | $2.37\pm0.30$         | $6.41\pm0.89$       |
|          | experiments    | $0.13\pm0.07$                         | $0.10\pm0.05$        | $1.92\pm0.04$ | $2.50\pm0.35$         | $5.98\pm0.45$       |
| Td       | 2D simulations | 0.12                                  | $0.15\pm0.02$        | $1.94\pm0.02$ | $5.10\pm1.71$         | $9.59\pm2.94$       |
|          | 3D simulations | 0.11                                  | $0.14\pm0.00$        | $1.94\pm0.01$ | $4.72\pm0.50$         | $14.06\pm1.76$      |
|          | experiments    | $0.12\pm0.05$                         | $0.14\pm0.06$        | $1.94\pm0.03$ | $5.17\pm1.69$         | $13.28\pm4.64$      |
| SgPg     | 2D simulations | 1.05                                  | $1.23\pm0.05$        | $1.41\pm0.07$ | $4.12\pm0.52$         | $9.56\pm1.47$       |
|          | 3D simulations | 1.09                                  | $1.20\pm0.01$        | $1.41\pm0.03$ | $3.90\pm0.19$         | $12.61\pm0.90$      |
|          | experiments    | $1.28\pm0.38$                         | $1.20\pm0.30$        | $1.42\pm0.17$ | $4.09\pm0.61$         | $11.83\pm1.13$      |
| SgTd     | 2D simulations | 2.46                                  | $2.78\pm0.08$        | $0.98\pm0.09$ | $5.01\pm0.53$         | $11.03\pm1.38$      |
|          | 3D simulations | 2.55                                  | $2.67\pm0.01$        | $0.89\pm0.05$ | $4.21\pm0.22$         | $11.70\pm0.84$      |
|          | experiments    | $3.11\pm0.53$                         | $2.66\pm0.44$        | $0.92\pm0.13$ | $4.17\pm0.28$         | $11.52\pm1.22$      |
| PgTd     | 2D simulations | 0.34                                  | $0.41\pm0.04$        | $1.85\pm0.03$ | $5.62\pm1.32$         | $11.60\pm2.71$      |
|          | 3D simulations | 0.37                                  | $0.42\pm0.01$        | $1.84\pm0.02$ | $5.39\pm0.54$         | $16.61\pm1.61$      |
|          | experiments    | $0.49\pm0.18$                         | $0.42\pm0.15$        | $1.71\pm0.09$ | $2.84\pm0.33$         | $8.75\pm1.02$       |
| SgPgTd   | 2D simulations | 1.72                                  | $1.91\pm0.06$        | $1.30\pm0.11$ | $5.45\pm0.95$         | $11.75\pm2.08$      |
|          | 3D simulations | 1.75                                  | $1.90\pm0.01$        | $1.33\pm0.04$ | $5.43\pm0.36$         | $16.65\pm1.32$      |
|          | experiments    | $1.77\pm0.43$                         | $1.86\pm0.46$        | $1.32\pm0.10$ | $5.14\pm0.58$         | $15.74\pm0.96$      |

Table S4: Comparison of 2D simulation (mean and standard deviation on  $N = 100$  simulations), 3D simulation (mean and standard deviation on  $N = 100$  simulations) and experimental results at  $8 \mu\text{M}$  of iron.
